# Supplementary material
Source: PubMed Central journal article supplement (PMC6454467)
Supplement: dey257suppl_data.pdf [file dey257suppl_data.pdf]

## Supplemental data I. Full search string

((Clustered Regularly Interspaced Short Palindromic Repeats [tiab] OR Caspase 9 [tiab] OR CRISPR-Cas Systems [MeSH] OR Zinc Fingers [tiab] OR Crispr-cas [tiab]) AND (Germ Cells OR Blastocyst OR Fetal therapies OR Fetal stem cells OR Germ-Line Mutation OR Semen OR Reproductive medicine OR Reproductive techniques, assisted OR Gamete\* [tiab] OR Sperm [tiab] OR Spermatid\* [tiab] OR Spermato\* [tiab] OR Ovum [tiab] OR Oocyt\* [tiab] OR Oogoni\* [tiab] OR Egg\* [tiab] OR Embryonic stem cell\* [tiab] OR ESC [tiab] OR Embryo\* [tiab] OR Blastocyst\* [tiab] OR Fetal\* [tiab] OR Zygot\* [tiab] OR Germ line [tiab] OR Germline [tiab] OR Germ-line [tiab]) AND (Therapy [MeSH] OR Therapeutics [MeSH] OR Gene targeting [MeSH] OR Cell engineering [MeSH] OR Genetic engineering OR Genetic therapy OR Targeted gene repair OR Engineer\* [tiab] OR Develop\* [tiab] OR Target\* [tiab] OR Modif\* [tiab] OR Induc\* [tiab] OR Alter\* [tiab] OR Interv\* [tiab] OR Therap\* [tiab] OR Target\* [tiab] OR Edit\* [tiab] OR advanced therap [tiab] OR advanced cell therap [tiab]))

OR

((Clustered Regularly Interspaced Short Palindromic Repeats [tiab] OR Caspase 9 [tiab] OR CRISPR-Cas Systems [MeSH] OR Zinc Fingers [tiab] OR Crispr-cas [tiab]) AND (Germ Cells OR Pluripotent stem cells OR Embryo research OR Blastocyst OR Fetus OR Fetal therapies OR Fetal research OR Fetal stem cells OR Germ-Line Mutation OR Semen OR Reproductive medicine OR Reproductive techniques, assisted OR Gamete\* [tiab] OR Sperm [tiab] OR Spermatid\* [tiab] OR Spermato\* [tiab] OR Ovum [tiab] OR Oocyt\* [tiab] OR Oogoni\* [tiab] OR Egg\* [tiab] OR Embryonic stem cell\* [tiab] OR ESC [tiab] OR Embryo\* [tiab] OR Blastocyst\* [tiab] OR Fetus [tiab] OR Fetal\* [tiab] OR Zygot\* [tiab] OR Assisted reproduct\* [tiab] OR ART [tiab] OR Reproductive medic\* [tiab] OR Germ line [tiab] OR Germline [tiab] OR Germ-line [tiab] OR pluripotent stem cell\* [tiab] OR Germ cell\* [tiab] OR semen [tiab] OR reproductive tech\* [tiab]) AND (Ethics OR Eugenics OR Morals OR Social Values OR Social Norms OR Role OR Virtues OR Social Change OR Humanism OR consensus OR discussion OR Implicat\* [tiab] OR Challenge\* [tiab] OR Socio\* [tiab] OR Ethic\* [tiab] OR Informed consent [tiab] OR Bioethic\* [tiab] OR Responsib\* [tiab] OR Eugenic\* [tiab] OR Legislat\* [tiab] OR Jurisprud\* [tiab] OR Risk\* [tiab] OR Advers\* [tiab] OR Moral\* [tiab] OR Virtue\* [tiab] OR Personhood [tiab] OR Principle\* [tiab] OR Humanis\* [tiab] OR consensus [tiab] OR discussion [tiab]) AND (germline modification [tiab] OR germline editing [tiab] OR germline gene editing [tiab] OR germline alteration [tiab] OR germline intervention [tiab] OR germ-line modification [tiab] OR germ-line editing [tiab] OR germ-line gene editing [tiab] OR germ-line alteration [tiab] OR germ-line intervention [tiab] OR germ line modification [tiab] OR germ line editing [tiab] OR germ line alteration [tiab] OR germ line intervention [tiab]))

OR

((Germ Cells OR Pluripotent stem cells OR Embryo research OR Blastocyst OR Fetus OR Fetal therapies OR Fetal research OR Fetal stem cells OR Germ-Line Mutation OR Semen OR Reproductive

medicine OR Reproductive techniques, assisted OR Gamete\* [tiab] OR Sperm [tiab] OR Spermatid\* [tiab] OR Spermato\* [tiab] OR Ovum [tiab] OR Oocyt\* [tiab] OR Oogoni\* [tiab] OR Egg\* [tiab] OR Embryonic stem cell\* [tiab] OR ESC [tiab] OR Embryo\* [tiab] OR Blastocyst\* [tiab] OR Fetus [tiab] OR Fetal\* [tiab] OR Zygot\* [tiab] OR Assisted reproduct\* [tiab] OR ART [tiab] OR Reproductive medic\* [tiab] OR Germ line [tiab] OR Germline [tiab] OR Germ-line [tiab] OR pluripotent stem cell\* [tiab] OR Germ cell\* [tiab] OR semen [tiab] OR reproductive tech\* [tiab]) AND (Ethics OR Eugenics OR Morals OR Social Values OR Social Norms OR Role OR Virtues OR Social Change OR Humanism OR consensus OR discussion OR Implicat\* [tiab] OR Challenge\* [tiab] OR Socio\* [tiab] OR Ethic\* [tiab] OR Informed consent [tiab] OR Bioethic\* [tiab] OR Responsib\* [tiab] OR Eugenic\* [tiab] OR Legislat\* [tiab] OR Jurisprud\* [tiab] OR Risk\* [tiab] OR Advers\* [tiab] OR Moral\* [tiab] OR Virtue\* [tiab] OR Personhood [tiab] OR Principle\* [tiab] OR Humanis\* [tiab] OR consensus [tiab] OR discussion [tiab]) AND (germline modification [tiab] OR germline editing [tiab] OR germline gene editing [tiab] OR germline alteration [tiab] OR germline intervention [tiab] OR germ-line modification [tiab] OR germ-line editing [tiab] OR germ-line gene editing [tiab] OR germ-line alteration [tiab] OR germ-line intervention [tiab] OR germ line modification [tiab] OR germ line editing [tiab] OR germ line alteration [tiab] OR germ line intervention [tiab]))

OR

((Germ-Line Mutation/Ethics) OR (Germ-Line Mutation/legislation & jurisprudence)) OR (((Germ-Line Mutation/therapy) OR (Germ-Line Mutation/therapeutics)) AND (Ethics OR Bioethics OR Social Responsibility OR Eugenics))

OR

((Gene targeting/Ethics) OR (Gene targeting/legislation & jurisprudence)) OR (((Gene targeting/therapy) OR (Gene targeting/therapeutics)) AND (Ethics OR Bioethics OR Social Responsibility OR Eugenics))

OR

((Cell engineering/Ethics) OR (Cell engineering/legislation & jurisprudence)) OR (((Cell engineering/therapy) OR (Cell engineering/therapeutics)) AND (Ethics OR Bioethics OR Social Responsibility OR Eugenics))

OR

((Targeted gene repair/Ethics) OR (Targeted gene repair/legislation & jurisprudence)) OR (((Targeted gene repair/therapy) OR (Targeted gene repair/therapeutics)) AND (Ethics OR Bioethics OR Social Responsibility OR Eugenics))

OR

((Genetic engineering/Ethics) OR (Genetic engineering/legislation & jurisprudence)) AND (Germ Cells OR Pluripotent stem cells OR Embryo research OR Blastocyst OR Fetus OR Fetal therapies OR

---

Fetal research OR Fetal stem cells OR Germ-Line Mutation OR Semen OR Reproductive medicine OR Reproductive techniques, assisted OR Gamete\* [tiab] OR Sperm [tiab] OR Spermatid\* [tiab] OR Spermato\* [tiab] OR Ovum [tiab] OR Oocyt\* [tiab] OR Oogoni\* [tiab] OR Egg\* [tiab] OR Embryonic stem cell\* [tiab] OR ESC [tiab] OR Embryo\* [tiab] OR Blastocyst\* [tiab] OR Fetus [tiab] OR Fetal\* [tiab] OR Zygot\* [tiab] OR Assisted reproduct\* [tiab] OR ART [tiab] OR Reproductive medic\* [tiab] OR Germ line [tiab] OR Germline [tiab] OR Germ-line [tiab] OR pluripotent stem cell\* [tiab] OR Germ cell\* [tiab] OR semen [tiab] OR reproductive tech\* [tiab])) OR (((Genetic engineering/therapy) OR (Genetic engineering/therapeutics)) AND (Ethics OR Bioethics OR Social Responsibility OR Eugenics))

OR  
(((Genetic therapy/Ethics) OR (Genetic therapy/legislation & jurisprudence)) AND (Germ Cells OR Blastocyst OR Fetus OR Fetal therapies OR Fetal stem cells OR Germ-Line Mutation OR Semen OR Reproductive medicine OR Reproductive techniques, assisted OR Gamete\* [tiab] OR Sperm [tiab] OR Spermatid\* [tiab] OR Spermato\* [tiab] OR Ovum [tiab] OR Oocyt\* [tiab] OR Oogoni\* [tiab] OR Egg\* [tiab] OR Embryonic stem cell\* [tiab] OR ESC [tiab] OR Embryo\* [tiab] OR Blastocyst\* [tiab] OR Fetal\* [tiab] OR Zygot\* [tiab] OR Germ line [tiab] OR Germline [tiab] OR Germ-line [tiab])) OR (((Genetic therapy/therapy) OR (Genetic therapy/therapeutics)) AND (Ethics OR Bioethics OR Social Responsibility OR Eugenics))
