# Supplementary material
Source: PubMed Central journal article supplement (PMC6454467)
Supplement: dey257suppl_table1.pdf [file dey257suppl_table1.pdf]

**Supplementary Table SI Reporting of domains over time.**

| Domain                                      | Reporting on domains per year |                   |                                 |                                   |                                                                                                                                                                                                                                                  |                                                                                      | p-value for difference between 2011–014 and 2015–2016 |
|---------------------------------------------|-------------------------------|-------------------|---------------------------------|-----------------------------------|--------------------------------------------------------------------------------------------------------------------------------------------------------------------------------------------------------------------------------------------------|--------------------------------------------------------------------------------------|-------------------------------------------------------|
|                                             | 2011                          | 2012              | 2013                            | 2014                              | 2015                                                                                                                                                                                                                                             | 2016*                                                                                |                                                       |
|                                             | N Reference                   | N Reference       | N Reference                     | N Reference                       | N Reference                                                                                                                                                                                                                                      | N Reference                                                                          |                                                       |
| Quality of life of affected individuals     | 9 6,7,36,37,46,53,59,63,64    | 5 27,43,45,58,161 | 9 9,22,30,32,42,129,136,141,154 | 9 1,16,39,108,110,111,119,147,149 | 116 2,3,8,10,11,14,17–20,23–26,29,31,33–35,38,40,41,44,47,54–56,60–62,66–71,73–77,79,81–90,92,94,95,97–107,109,112–118,120–124,126–128,131–133,135,138,139,142–146,148,150,152,153,155–159,162,165,166,168–172,174–176,178–180                   | 27 4,5,12,13,15,21,28,48–51,57,65,72,78,80,91,93,125,130,134,137,140,160,163,164,167 | 0.59                                                  |
| Safety                                      | 9 6,7,36,37,46,53,59,63,64    | 4 43,45,58,161    | 7 9,30,32,42,129,136,141        | 9 1,16,39,108,110,111,119,147,149 | 111 2,3,8,10,11,14,17–20,23–26,29,31,33–35,38,40,41,44,47,54–56,60–62,66–71,73–77,79,81,83–90,92,94,95,97–100,102–107,113–118,120–124,126–128,131,132,135,139,142–146,148,150–152,155–159,162,165,168–180                                        | 25 4,5,12,13,15,21,28,48–52,57,72,78,91,93,125,130,134,137,140,160,163,164           | 0.73                                                  |
| Effectiveness                               | 4 36,37,63,64                 | 2 43,45           | 5 32,42,129,136,141             | 7 1,16,108,110,111,119,149        | 94 2,3,8,10,11,14,17–19,23–26,29,34,35,38,40,41,44,47,55,56,60,62,67,68,70,71,73–77,79,81–83,85–87,89,90,92,94,95,97–100,102–107,109,112,113,115,117,118,120–124,126–128,131,133,139,142,144–146,148,150–152,155–159,162,165,169–171,175,178,180 | 20 4,12,13,15,28,48,50,57,65,72,78,91,93,125,134,137,140,160,163,164                 | <b>0.03</b>                                           |
| Existence of a clinical need or alternative | 4 6,36,37,64                  | 2 43,161          | 2 32,129                        | 4 1,108,119,149                   | 48 10,17–19,24,26,31,34,35,38,44,47,55,60,66,67,70,71,73,79,81,84,85,88,95,98–100,103,106,114,117,118,121,124,127,131,139,144–146,155,162,169,175,178–180                                                                                        | 15 4,12,13,28,48,51,72,91,125,134,137,140,160,163,164                                | 0.69                                                  |
| Costs                                       | 0                             | 1 43              | 1 136                           | 3 1,119,149                       | 38 2,3,10,17,24,31,35,38,40,44,55,56,60,62,68,82,87,90,92,95,98–100,102,106,117,126,127,148,150,152,155,157,158,174,175,178,180                                                                                                                  | 8 28,48,50,72,80,91,137,163                                                          | 0.09                                                  |
| Homo sapiens as a species                   | 7 6,7,36,37,53,59,64          | 3 43,58,161       | 7 9,32,42,129,136,141,154       | 3 1,16,110                        | 80 2,8,10,11,14,17–20,24–26,29,31,34,35,41,44,47,55,56,60–62,67–71,76,79,81,83,85,87–90,98–103,106,107,109,115–118,120–124,126–128,131–133,138,139,142,144–146,148,152,156–158,165,171,174–176,178,179                                           | 14 12,13,21,28,48–51,91,130,137,160,163,164                                          | 1.00                                                  |
| Social justice                              | 5 6,7,36,37,64                | 3 43,45,58        | 4 22,32,136,154                 | 1 1                               | 31 3,10,11,17,26,35,44,47,55,60,62,76,77,79,84,89,117,121,127,131,138,152,156,158,162,165,174–176,178,179                                                                                                                                        | 10 13,21,28,48,50,57,91,160,163,164                                                  | 0.20                                                  |
| Potential for misuse                        | 3 37,59,63                    | 1 43              | 2 9,32                          | 1 1                               | 35 10,17,18,20,23,24,34,35,40,44,54–56,62,68,77,83,86,87,99,102,106,109,112,116,121,126,127,143,157,162,174,175,178,180                                                                                                                          | 12 21,48–50,52,78,80,91,125,160,163,164                                              | 0.30                                                  |
| Special interests                           | 0                             | 1 161             | 0                               | 3 111,119,149                     | 41 3,35,41,44,54–56,60,62,69,75,87,88,90,92,99–103,105–107,112,115–118,120,121,127,131,138,142,143,155,156,158,165,175,176                                                                                                                       | 7 4,48–50,72,160,163                                                                 | <b>0.03</b>                                           |
| Parental rights and duties                  | 7 6,7,36,37,46,59,64          | 3 43,45,161       | 3 22,129,154                    | 2 1,39                            | 20 10,11,18,23,31,34,35,38,40,44,47,61,87,117,131,156,158,162,174,178                                                                                                                                                                            | 10 4,12,13,21,28,48,51,72,91,137                                                     | <b>0.003</b>                                          |

Continued

**Supplementary Table SI** *Continued*

| Domain                                | Reporting on domains per year |                          |      |                 |      |                               |      | p-value for difference between 2011–2014 and 2015–2016 |           |                                                                                                                                                                                                  |           |                                                                                   |              |
|---------------------------------------|-------------------------------|--------------------------|------|-----------------|------|-------------------------------|------|--------------------------------------------------------|-----------|--------------------------------------------------------------------------------------------------------------------------------------------------------------------------------------------------|-----------|-----------------------------------------------------------------------------------|--------------|
|                                       | 2011                          |                          | 2012 |                 | 2013 |                               | 2014 |                                                        | 2015      |                                                                                                                                                                                                  | 2016*     |                                                                                   |              |
|                                       | N                             | Reference                | N    | Reference       | N    | Reference                     | N    |                                                        | Reference | N                                                                                                                                                                                                | Reference | N                                                                                 | Reference    |
| Comparability to acceptable processes | 9                             | 6,7,36,37,46,53,59,63,64 | 4    | 43,45,58,161    | 5    | 9,22,32,141,154               | 1    | 119                                                    | 33        | 10,11,17,18,20,25,26,31,33,35,38,40,44,55,56,61,62,85,90,99,100,107,115,117,118,139,145,155,156,162,175,177,178                                                                                  | 11        | 12,13,21,28,48–51,72,91,164                                                       | <b>0.002</b> |
| Rights of the unborn child            | 5                             | 6,7,36,46,53             | 3    | 43,45,58        | 2    | 22,32                         | 2    | 1,39                                                   | 26        | 3,11,14,17,18,35,38,40,44,47,55,56,61,70,75,99,106,117,124,127,131,158,165,169,175,176                                                                                                           | 9         | 12,28,48,52,57,72,125,130,160                                                     | 0.12         |
| Human life and dignity                | 7                             | 6,7,36,46,53,63,64       | 4    | 27,43,58,161    | 3    | 22,32,129                     | 3    | 1,16,39                                                | 33        | 14,17,18,20,23,34,35,38,41,44,54,55,60–62,67,82,84,90,99,100,115–117,121,131,138,152,155,156,165,175,178                                                                                         | 11        | 12,13,15,21,28,48,51,91,125,160,163                                               | <b>0.01</b>  |
| Total                                 | 9                             | 6,7,36,37,46,53,59,63,64 | 5    | 27,43,45,58,161 | 9    | 9,22,30,32,42,129,136,141,154 | 9    | 1,16,39,108,110,111,119,147,149                        | 120       | 2,3,8,10,11,14,17–20,23–26,29,31,33–35,38,40,41,44,47,54–56,60–62,66–71,73–77,79,81–90,92,94–107,109,112–118,120–124,126–128,131–133,135,138,139,142–146,148,150–153,155–159,162,165,166,168–180 | 28        | 4,5,12,13,15,21,28,48–52,57,65,72,78,80,91,93,125,130,134,137,140,160,163,164,167 | N/A          |

\*Articles were included until June of 2016.  
Reference numbers correspond to references in Table IV.
